# Supplementary material for: Effect of Adding Pulses to Replace Protein Foods and Refined Grains in Healthy Dietary Patterns
Source: MDPI journal article supplement (doi:10.3390/nu15204355), 2023-10-13
Supplement: s1 [file s1]

Supplemental Table S1. Cups per day of pulses in different modeling scenarios.

| Modeling Scenario number | Modeling Scenario details                                                                        | Pulses (cups/day) |
|--------------------------|--------------------------------------------------------------------------------------------------|-------------------|
| 1A                       | Addition of 0.25 cups/week Pulses replacing 1 oz eq/week Protein Foods                           | 0.04              |
| 1B                       | Addition of 0.5 cups/week Pulses replacing 2 oz eq/week Protein Foods                            | 0.07              |
| 1C                       | Addition of 1.0 cups/week Pulses replacing 4 oz eq/week Protein Foods                            | 0.14              |
| 1D                       | Addition of 1.5 cups/week Pulses replacing 6 oz eq/week Protein Foods                            | 0.21              |
| 1E                       | Addition of 2.0 cups/week Pulses replacing 8 oz eq/week Protein Foods                            | 0.29              |
| 2A                       | Addition of 0.5 cups/day Pulses replacing 1 oz eq/day Refined Grains                             | 0.50              |
| 2B                       | Addition of 1.0 cups/day Pulses replacing 2 oz eq/day Refined Grains                             | 1.00              |
| 2C                       | Addition of 1.5 cups/day Pulses replacing 3 oz eq/day Refined Grains                             | 1.50              |
| 2D                       | Addition of 2.0 cups/day Pulses replacing 4 oz eq/day Refined Grains                             | 2.00              |
| 3A                       | Addition of 1.0 cups/day Pulses replacing 2 oz/day Protein Foods and 1 oz/d Refined Grains       | 1.00              |
| 3B                       | Addition of 1.5 cups/day Pulses replacing 2 oz/day Protein Foods and 2 oz/d Refined Grains       | 1.50              |
| 3C                       | Addition of 2.0 cups/day Pulses replacing 2 oz/day Protein Foods and 3 oz/d Refined Grains       | 2.00              |
| 4A                       | Addition of 1.5 cups/day Pulses replacing 4 oz/day Protein Foods and 1 oz/d Refined Grains       | 1.50              |
| 4B                       | Addition of 2.0 cups/day Pulses replacing 4 oz/day Protein Foods and 2 oz/d Refined Grains       | 2.00              |
| 4C                       | After addition of 2.5 cups/day Pulses replacing 4 oz/day Protein Foods and 3 oz/d Refined Grains | 2.50              |
